# Supplementary material
Source: PubMed Central journal article supplement (PMC5209292)
Supplement: NIHMS834035-supplement-Supplemntal_Information.pdf [file NIHMS834035-supplement-Supplemntal_Information.pdf]

## Online Supporting Information

### **Weight change in the management of youth-onset type 2 diabetes: the TODAY clinical trial experience**

**Authors:** Marsha D Marcus Ph.D.<sup>1</sup>, Denise E Wilfley Ph.D.<sup>2</sup>, Laure El ghormli M.Sc.<sup>3</sup>, Philip Zeitler M.D., Ph.D.<sup>4</sup>, Barbara Linder M.D., Ph.D.<sup>5</sup>, Kathryn Hirst Ph.D.<sup>3</sup>, Carolyn E. Ievers-Landis Ph.D.<sup>6</sup>, Dorothy J van Buren Ph.D.<sup>7</sup>, Natalie Walders-Abramson Ph.D.<sup>4</sup>

<sup>1</sup> Department of Psychiatry, University of Pittsburgh School of Medicine, Pittsburgh, PA

<sup>2</sup> Department of Psychiatry, Washington University School of Medicine, St Louis, MO

<sup>3</sup> George Washington University Biostatistics Center, Rockville, MD

<sup>4</sup> Department of Pediatrics, Section of Endocrinology, University of Colorado School of Medicine, Aurora, CO

<sup>5</sup> Division of Diabetes, Endocrinology and Metabolic Diseases, National Institute of Diabetes and Digestive and Kidney Diseases, Bethesda, MD

<sup>6</sup> Rainbow Babies and Children's Hospital, University Hospitals Case Medical Center, Cleveland, OH

<sup>7</sup> Department of Psychiatry, Washington University School of Medicine, St Louis, MO

For the TODAY Study Group\*

\* A listing of the TODAY Study Group is included in the online appendix materials

**Figure S1. Change from baseline in percent overweight (A) and percent of youth who achieved a drop  $\geq 7\%$  since baseline (B) across study visits (at 6, 12, and 24 months) by treatment group\***

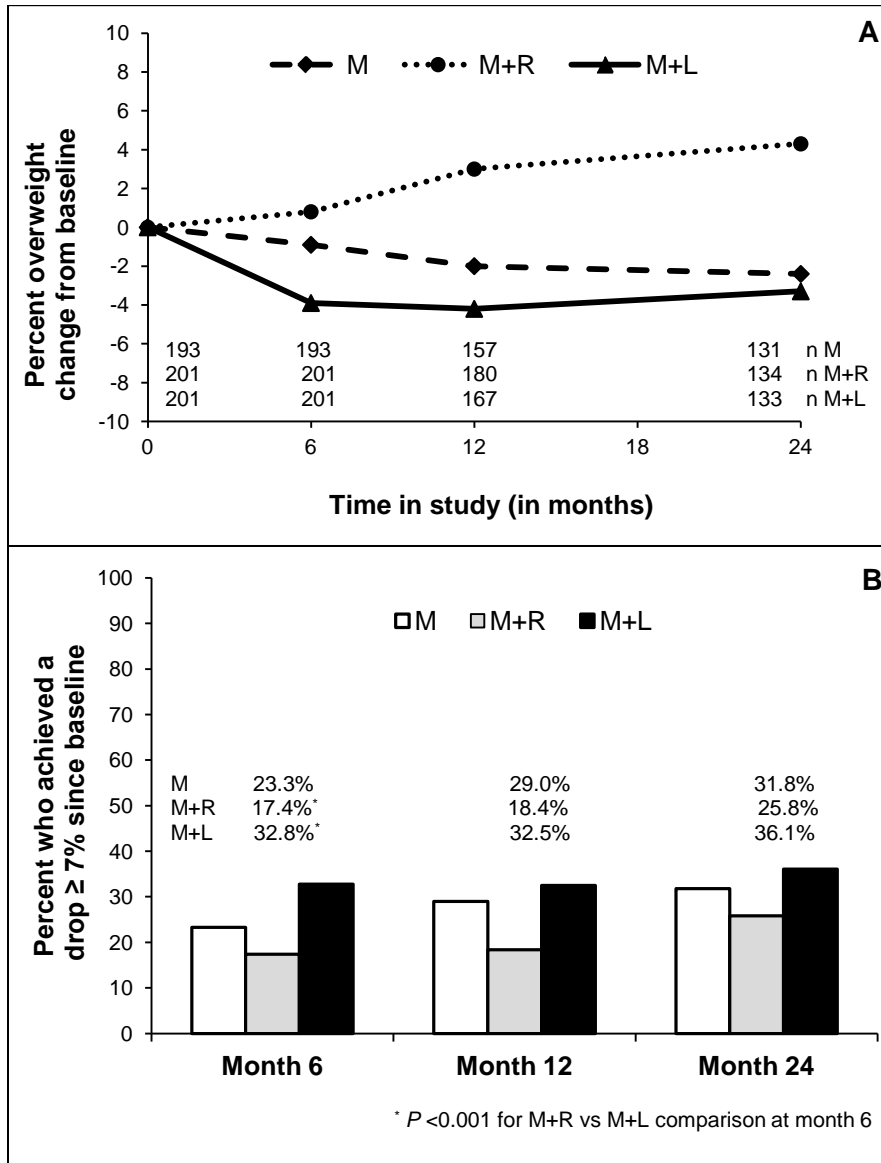

\* The three treatment groups are: metformin monotherapy (M), metformin plus rosiglitazone (M+R), and metformin plus intensive lifestyle (M+L). ‘n’ represents the number of participants with data available.

**Table S1. BMI and change from baseline ( $\Delta$ ) across study visits by treatment group\***

|                      | BMI and $\Delta$ |                |                | Pairwise comparison <i>P</i> value |           |             |
|----------------------|------------------|----------------|----------------|------------------------------------|-----------|-------------|
|                      | M                | M+R            | M+L            | M vs. M+R                          | M vs. M+L | M+R vs. M+L |
| Baseline             | 35.3 $\pm$ 7.9   | 35.2 $\pm$ 7.8 | 33.8 $\pm$ 7.3 |                                    |           |             |
| <i>n</i> at baseline | 193              | 201            | 105            |                                    |           |             |
| Month 6              | 35.6 $\pm$ 8.0   | 36.0 $\pm$ 8.1 | 33.6 $\pm$ 7.7 |                                    |           |             |
| $\Delta$ 6-0         | +0.4 $\pm$ 1.6   | +0.7 $\pm$ 1.8 | -0.2 $\pm$ 1.8 | 0.1254                             | 0.0128    | <.0001      |
| Month 12             | 35.6 $\pm$ 8.4   | 37.1 $\pm$ 8.4 | 33.9 $\pm$ 8.1 |                                    |           |             |
| $\Delta$ 12-0        | +0.7 $\pm$ 2.2   | +1.7 $\pm$ 2.5 | +0.2 $\pm$ 2.3 | <.0001                             | 0.1479    | <.0001      |
| Month 24             | 36.6 $\pm$ 9.1   | 38.2 $\pm$ 8.2 | 35.3 $\pm$ 8.4 |                                    |           |             |
| $\Delta$ 24-0        | +1.6 $\pm$ 2.9   | +3.0 $\pm$ 3.6 | +1.4 $\pm$ 3.0 | <.0001                             | 0.5990    | <.0001      |

\* Mean  $\pm$  SD are presented. The three treatment groups are: metformin monotherapy (M), metformin plus rosiglitazone (M+R), and metformin plus intensive lifestyle (M+L). *P* values were calculated from repeated measures models testing for pairwise treatment differences in BMI change during the first 2 years of the study. *P* values presented are from adjusted models for baseline BMI, time, treatment, sex, age at baseline, race-ethnicity, percent overweight change during run-in, and an interaction term for time-by-treatment.

**Table S2. Percent overweight and change from baseline ( $\Delta$ ) across study visits, among youth in the M+L group who attended at least 75% of the intensive lifestyle change phase sessions, by treatment group\***

|                      | Percent overweight and $\Delta$ |                 |                 | Pairwise comparison <i>P</i> value |           |             |
|----------------------|---------------------------------|-----------------|-----------------|------------------------------------|-----------|-------------|
|                      | M                               | M+R             | M+L             | M vs. M+R                          | M vs. M+L | M+R vs. M+L |
| Baseline             | 80.1 $\pm$ 38.1                 | 80.2 $\pm$ 38.3 | 75.4 $\pm$ 39.2 |                                    |           |             |
| <i>n</i> at baseline | 193                             | 201             | 105             |                                    |           |             |
| Month 6              | 79.2 $\pm$ 38.3                 | 81.1 $\pm$ 39.3 | 70.5 $\pm$ 40.2 |                                    |           |             |
| $\Delta$ 6-0         | -0.9 $\pm$ 8.3                  | +0.8 $\pm$ 8.9  | -4.9 $\pm$ 9.7  | 0.1383                             | 0.0048    | <.0001      |
| Month 12             | 76.8 $\pm$ 40.0                 | 84.1 $\pm$ 41.1 | 69.6 $\pm$ 41.0 |                                    |           |             |
| $\Delta$ 12-0        | -2.0 $\pm$ 10.9                 | +3.0 $\pm$ 12.4 | -5.3 $\pm$ 11.5 | 0.0001                             | 0.0266    | <.0001      |
| Month 24             | 77.4 $\pm$ 41.8                 | 85.6 $\pm$ 38.9 | 71.7 $\pm$ 40.9 |                                    |           |             |
| $\Delta$ 24-0        | -2.4 $\pm$ 14.4                 | +4.3 $\pm$ 17.4 | -5.5 $\pm$ 15.0 | <.0001                             | 0.0686    | <.0001      |

\* Mean  $\pm$  SD are presented. The three treatment groups are: metformin monotherapy (M), metformin plus rosiglitazone (M+R), and metformin plus intensive lifestyle (M+L). *P* values were calculated from repeated measures models testing for pairwise treatment differences in percent overweight change during the first 2 years of the study. *P* values presented are from adjusted models for baseline percent overweight, time, treatment, sex, age at baseline, race-ethnicity, percent overweight change during run-in, and an interaction term for time-by-treatment.

**Figure S2. Percent (%) of youth who achieved a drop  $\geq 7\%$  since baseline across study visits, by treatment group, among youth in the M+L group who attended at least 75% of the intensive lifestyle change phase sessions\***

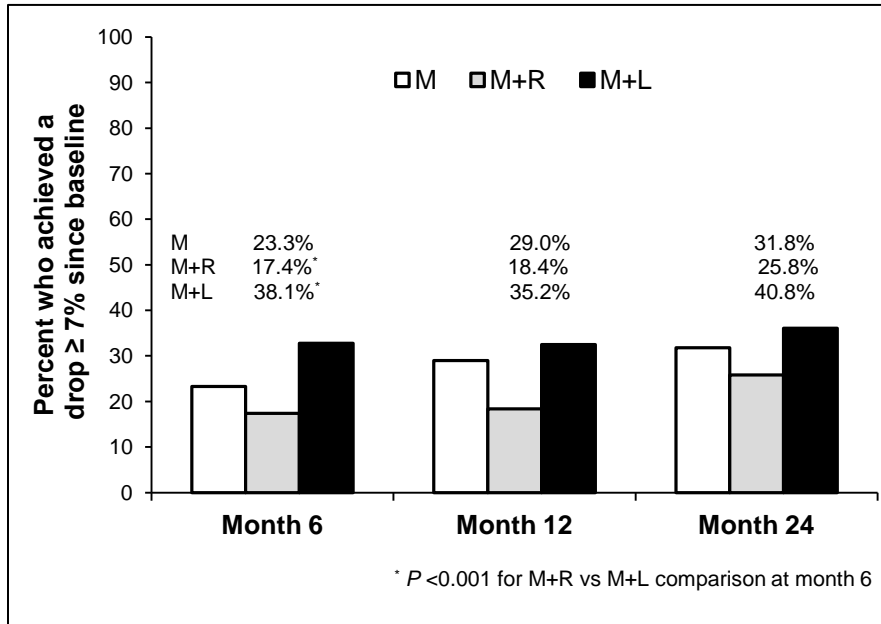

\* The three treatment groups are: metformin monotherapy (M), metformin plus rosiglitazone (M+R), and metformin plus intensive lifestyle (M+L). *P* values were calculated from GEE repeated measures models testing for pairwise treatment differences in participants who achieved a 7% drop in percent overweight over time. *P* values presented are from adjusted models for baseline percent overweight, time, treatment, sex, age at baseline, race-ethnicity, percent overweight change during run-in, and an interaction term for time-by-treatment.

**Table S3. Descriptive statistics for percent overweight and change from baseline ( $\Delta$ ) across study visits, by treatment group and sex**

|                      | Female          |                 |                 | Male            |                 |                 |
|----------------------|-----------------|-----------------|-----------------|-----------------|-----------------|-----------------|
|                      | M               | M+R             | M+L             | M               | M+R             | M+L             |
| Baseline             | 80.3 $\pm$ 36.1 | 79.0 $\pm$ 39.2 | 75.7 $\pm$ 35.3 | 79.8 $\pm$ 41.4 | 82.4 $\pm$ 36.9 | 72.7 $\pm$ 38.3 |
| <i>n at baseline</i> | 121             | 128             | 129             | 72              | 73              | 72              |
| Month 6              | 79.3 $\pm$ 36.6 | 81.0 $\pm$ 39.5 | 72.6 $\pm$ 36.6 | 79.2 $\pm$ 41.2 | 81.2 $\pm$ 39.3 | 67.3 $\pm$ 38.8 |
| $\Delta$ 6-0         | -1.1 $\pm$ 7.6  | +2.0 $\pm$ 8.9  | -3.2 $\pm$ 9.0  | -0.6 $\pm$ 9.4  | -1.2 $\pm$ 8.5  | -5.4 $\pm$ 9.5  |
| Month 12             | 77.1 $\pm$ 38.8 | 84.5 $\pm$ 41.3 | 71.4 $\pm$ 38.6 | 76.5 $\pm$ 42.1 | 83.4 $\pm$ 40.8 | 69.5 $\pm$ 39.3 |
| $\Delta$ 12-0        | -2.1 $\pm$ 10.3 | +4.7 $\pm$ 12.0 | -3.5 $\pm$ 11.2 | -1.7 $\pm$ 11.8 | -0.1 $\pm$ 12.5 | -5.4 $\pm$ 12.3 |
| Month 24             | 82.0 $\pm$ 42.0 | 87.1 $\pm$ 40.8 | 76.5 $\pm$ 41.0 | 69.5 $\pm$ 40.8 | 82.5 $\pm$ 35.1 | 65.3 $\pm$ 36.8 |
| $\Delta$ 24-0        | -0.9 $\pm$ 15.0 | +7.1 $\pm$ 17.0 | -1.4 $\pm$ 14.8 | -5.0 $\pm$ 13.1 | -1.5 $\pm$ 16.9 | -6.5 $\pm$ 13.5 |

**Table S4. Descriptive statistics for percent (%) of youth who achieved a  $\geq 7\%$  drop in percent overweight since baseline across study visits, by treatment group and sex**

|          | Female |       |       | Male  |       |       |
|----------|--------|-------|-------|-------|-------|-------|
|          | M      | M+R   | M+L   | M     | M+R   | M+L   |
| Month 6  | 22.3%  | 14.1% | 29.5% | 25.0% | 23.3% | 38.9% |
| Month 12 | 30.9%  | 12.8% | 33.3% | 26.2% | 29.0% | 31.1% |
| Month 24 | 29.6%  | 16.9% | 29.8% | 35.4% | 44.2% | 46.9% |

**Table S5. Association between changes in percent overweight and cardiometabolic outcomes during the first 2 years of the study\***

| Cardiometabolic outcome  | Estimate of change in cardiometabolic outcome associated with 1% decrease in percent overweight<br><i>(increase if estimate is positive, decrease if negative)</i> | <i>P</i> value for association |
|--------------------------|--------------------------------------------------------------------------------------------------------------------------------------------------------------------|--------------------------------|
| HbA1c                    | -0.0136 %                                                                                                                                                          | <.0001                         |
| Systolic blood pressure  | -0.1054 mmHg                                                                                                                                                       | <.0001                         |
| Diastolic blood pressure | -0.0461 mmHg                                                                                                                                                       | 0.0146                         |
| LDL                      | -0.0049 mmol L <sup>-1</sup>                                                                                                                                       | <.0001                         |
| HDL                      | +0.0017 mmol L <sup>-1</sup>                                                                                                                                       | <.0001                         |
| Total cholesterol        | -0.0069 mmol L <sup>-1</sup>                                                                                                                                       | <.0001                         |
| Triglycerides            | -0.0086 mmol L <sup>-1</sup>                                                                                                                                       | <.0001                         |
| C-peptide oDI            | +0.0001                                                                                                                                                            | <.0001                         |

\* Association (dose-response) between change in metabolic outcome and change in percent overweight since baseline corresponding to the same time period, during the first 2 years of the study. *P* values are obtained from repeated-measures models adjusted for the baseline value of the cardiometabolic outcome, treatment, sex, race-ethnicity, age at baseline, and change in percent overweight during run-in. Associations of change at month 6, 12, and 24 were considered for all outcomes except for oral disposition index, as OGTTs were not obtained at month 12 per study protocol.

**Table S6. Descriptive statistics for cardiometabolic outcomes and change from baseline ( $\Delta$ ) for all visits combined, by treatment group and by percent (%) of youth who achieved a  $\geq 7\%$  drop in percent overweight since baseline**

|                                                | M                       |          |                  |          | M+R                     |          |                  |          | M+L                     |          |                  |          | P-value* for interaction between 7% weight drop and treatment group |
|------------------------------------------------|-------------------------|----------|------------------|----------|-------------------------|----------|------------------|----------|-------------------------|----------|------------------|----------|---------------------------------------------------------------------|
|                                                | Did not achieve 7% drop |          | Achieved 7% drop |          | Did not achieve 7% drop |          | Achieved 7% drop |          | Did not achieve 7% drop |          | Achieved 7% drop |          |                                                                     |
|                                                | Mean                    | (SD)     | Mean             | (SD)     | Mean                    | (SD)     | Mean             | (SD)     | Mean                    | (SD)     | Mean             | (SD)     |                                                                     |
| <b>HbA1c</b>                                   | 6.2                     | (0.9)    | 6.1              | (1.3)    | 6.0                     | (1.0)    | 5.8              | (1.0)    | 6.1                     | (1.0)    | 5.7              | (0.8)    |                                                                     |
| $\Delta$ from baseline                         | 0.4                     | (0.7)    | 0.1              | (1.2)    | 0.2                     | (0.9)    | -0.1             | (0.9)    | 0.4                     | (0.8)    | -0.1             | (0.6)    | <i>P</i> =0.4483                                                    |
| <b>SBP (mmHg)</b>                              | 115.1                   | (10.9)   | 111.6            | (11.7)   | 114.7                   | (10.8)   | 115.3            | (10.9)   | 114.2                   | (10.8)   | 112.8            | (11.7)   |                                                                     |
| $\Delta$ from baseline                         | 2.5                     | (9.4)    | -1.4             | (9.5)    | 2.2                     | (9.5)    | -2.0             | (9.9)    | 2.5                     | (10.0)   | 0.8              | (10.6)   | <i>P</i> =0.1231                                                    |
| <b>DBP (mmHg)</b>                              | 67.5                    | (8.3)    | 65.8             | (9.1)    | 68.2                    | (8.7)    | 68.2             | (7.8)    | 67.3                    | (9.4)    | 66.7             | (8.6)    |                                                                     |
| $\Delta$ from baseline                         | 1.8                     | (8.7)    | -0.3             | (9.1)    | 1.6                     | (8.5)    | -1.0             | (8.3)    | 1.1                     | (9.3)    | 0.8              | (9.3)    | <i>P</i> =0.2315                                                    |
| <b>LDL (mmol L<sup>-1</sup>)</b>               | 2.30                    | (0.69)   | 2.34             | (0.78)   | 2.28                    | (0.72)   | 2.01             | (0.63)   | 2.30                    | (0.65)   | 2.19             | (0.70)   |                                                                     |
| $\Delta$ from baseline                         | 0.21                    | (0.46)   | 0.05             | (0.42)   | 0.05                    | (0.51)   | -0.03            | (0.44)   | 0.14                    | (0.48)   | -0.04            | (0.42)   | <i>P</i> =0.7535                                                    |
| <b>HDL (mmol L<sup>-1</sup>)</b>               | 1.01                    | (0.22)   | 1.09             | (0.27)   | 1.09                    | (0.27)   | 1.14             | (0.29)   | 1.06                    | (0.22)   | 1.12             | (0.26)   |                                                                     |
| $\Delta$ from baseline                         | 0.05                    | (0.14)   | 0.11             | (0.17)   | 0.07                    | (0.20)   | 0.13             | (0.23)   | 0.05                    | (0.17)   | 0.09             | (0.16)   | <i>P</i> =0.9757                                                    |
| <b>Total cholesterol (mmol L<sup>-1</sup>)</b> | 3.95                    | (0.78)   | 3.96             | (0.93)   | 4.00                    | (0.85)   | 3.64             | (0.77)   | 3.93                    | (0.79)   | 3.88             | (0.90)   |                                                                     |
| $\Delta$ from baseline                         | 0.31                    | (0.54)   | 0.16             | (0.54)   | 0.17                    | (0.61)   | 0.08             | (0.53)   | 0.25                    | (0.59)   | 0.05             | (0.49)   | <i>P</i> =0.8669                                                    |
| <b>Triglyceride (mmol L<sup>-1</sup>)</b>      | 1.40                    | (0.74)   | 1.16             | (0.65)   | 1.43                    | (1.06)   | 1.08             | (0.69)   | 1.25                    | (0.78)   | 1.24             | (1.04)   |                                                                     |
| $\Delta$ from baseline                         | 0.12                    | (0.65)   | -0.00            | (0.47)   | 0.15                    | (0.70)   | -0.02            | (0.48)   | 0.13                    | (0.54)   | -0.01            | (0.60)   | <i>P</i> =0.8612                                                    |
| <b>C-peptide oDI</b>                           | 0.0024                  | (0.0021) | 0.0040           | (0.0042) | 0.0041                  | (0.0057) | 0.0051           | (0.0037) | 0.0024                  | (0.0023) | 0.0062           | (0.0066) |                                                                     |
| $\Delta$ from baseline                         | -0.0008                 | (0.0024) | 0.0005           | (0.0037) | 0.0003                  | (0.0057) | 0.0015           | (0.0041) | -0.0009                 | (0.0030) | 0.0012           | (0.0059) | <i>P</i> =0.0525                                                    |

\* Mean  $\pm$  SD collapsed across the 3 visits (month 6, 12, and 24) are presented. The three treatment groups are: metformin monotherapy (M), metformin plus rosiglitazone (M+R), and metformin plus intensive lifestyle (M+L). *P* values were calculated from GEE repeated measures models evaluating the relation between change from baseline in cardiometabolic outcome and weight change based on the dichotomized measure (i.e., percent overweight decrease  $\geq 7\%$ ), adjusted for the baseline value of the cardiometabolic outcome, visit, treatment, sex, race-ethnicity, age at baseline, and change in percent overweight during run-in. The *P* value represents the interaction between the dichotomized weight change measure and treatment group.

## **Listing of the TODAY Study Group**

The following individuals and institutions constitute the TODAY Study Group (\* indicates principal investigator or director):

**CLINICAL CENTERS** **Baylor College of Medicine:** S. McKay\*, M. Haymond\*, B. Anderson, C. Bush, S. Gunn, H. Holden, S.M. Jones, G. Jeha, S. McGirk, S. Thamocharan **Case Western Reserve University:** L. Cuttler\*, E. Abrams, T. Casey, W. Dahms (deceased), C. Ievers-Landis, B. Kaminski, M. Koontz, S. MacLeish, P. McGuigan, S. Narasimhan **Children's Hospital Los Angeles:** M. Geffner\*, V. Barraza, N. Chang, B. Conrad, D. Dreimane, S. Estrada, L. Fisher, E. Fleury-Milfort, S. Hernandez, B. Hollen, F. Kaufman, E. Law, V. Mansilla, D. Miller, C. Muñoz, R. Ortiz, A. Ward, K. Wexler, Y.K. Xu, P. Yasuda **Children's Hospital of Philadelphia:** L. Levitt Katz\*, R. Berkowitz, S. Boyd, B. Johnson, J. Kaplan, C. Keating, C. Lassiter, T. Lipman, G. McGinley, H. McKnight, B. Schwartzman, S. Willi **Children's Hospital of Pittsburgh:** S. Arslanian\*, F. Bacha, S. Foster, B. Galvin, T. Hannon, A. Kriska, I. Libman, M. Marcus, K. Porter, T. Songer, E. Venditti **Columbia University Medical Center:** R. Goland\*, D. Gallagher, P. Kringas, N. Leibel, D. Ng, M. Ovalles, D. Seidman **Joslin Diabetes Center:** L. Laffel\*, A. Goebel-Fabbri, M. Hall, L. Higgins, J. Keady, M. Malloy, K. Milaszewski, L. Rasbach **Massachusetts General Hospital:** D.M. Nathan\*, A. Angelescu, L. Bissett, C. Ciccarelli, L. Delahanty, V. Goldman, O. Hardy, M. Larkin, L. Levitsky, R. McEachern, D. Norman, D. Nwosu, S. Park-Bennett, D. Richards, N. Sherry, B. Steiner **Saint Louis University:** S. Tollefsen\*, S. Carnes, D. Dempsher, D. Flomo, T. Whelan, B. Wolff **State University of New York Upstate Medical University:** R. Weinstock\*, D. Bowerman, S. Bristol, J. Bulger, J. Hartsig, R. Izquierdo, J. Kearns, R. Saletsky, P. Trief **University of Colorado Denver:** P. Zeitler\* (Steering Committee Chair), N. Abramson, A. Bradhurst, N. Celona-Jacobs, J. Higgins, M. Kelsey, G. Klingensmith, K. Nadeau, T. Witten **University of Oklahoma Health Sciences Center:** K. Copeland\* (Steering Committee Vice-Chair), E. Boss, R. Brown, J. Chadwick, L. Chalmers, S. Chernausk, A. Hebensperger, C. Macha, R. Newgent, A. Nordyke, D. Olson, T. Poulsen, L. Pratt, J. Preske, J. Schanuel, S. Sternlof **University of Texas Health Science Center at San Antonio:** J. Lynch\*, N. Amodei, R. Barajas, C. Cody, D. Hale, J. Hernandez, C. Ibarra, E. Morales, S. Rivera, G. Rupert, A. Wauters **Washington University in St Louis:** N. White\*, A. Arbeláez, D. Flomo, J. Jones, T. Jones, M. Sadler, M. Tanner, A. Timpson, R. Welch **Yale University:** S. Caprio\*, M. Grey, C. Guandalini, S. Lavietes, P. Rose, A. Syme, W. Tamborlane

**COORDINATING CENTER** **George Washington University Biostatistics Center:** K. Hirst\*, S. Edelstein, P. Feit, N. Grover, C. Long, L. Pyle

**PROJECT OFFICE** **National Institute of Diabetes and Digestive and Kidney Diseases:** B. Linder\*

**CENTRAL UNITS** **Central Blood Laboratory (Northwest Lipid Research Laboratories, University of Washington):** S.M. Marcovina\*, J. Harting **DEXA Reading Center (University of California at San Francisco):** J. Shepherd\*, B. Fan, L. Marquez, M. Sherman, J. Wang **Diet Assessment Center (University of South Carolina):** M. Nichols\*, E. Mayer-Davis, Y. Liu **Echocardiogram Reading Center (Johns Hopkins University):** J. Lima\*, S. Gidding, J. Puccella, E. Ricketts **Fundus Photography Reading Center (University of Wisconsin):** R. Danis\*, A. Domalpally, A. Goulding, S. Neill, P. Vargo **Lifestyle Program Core (Washington University):** D. Wilfley\*, D. Aldrich-Rasche, K. Franklin, C. Massmann, D. O'Brien, J. Patterson, T. Tibbs, D. Van Buren

**OTHER** **Hospital for Sick Children, Toronto:** M. Palmert **Medstar Research Institute, Washington DC:** R. Ratner **Texas Tech University Health Sciences Center:** D. Dremaine **University of Florida:** J. Silverstein
